# Supplementary material for: Influence of the sunspot cycle on the Northern Hemisphere wintertime circulation from long upper-air data sets
Source: Copernicus journal article supplement (doi:10.5194/acp-13-6275-2013), 2013-07-03
Supplement: Supplementary file 1 [file acp-13-6275-2013-supplement.pdf]

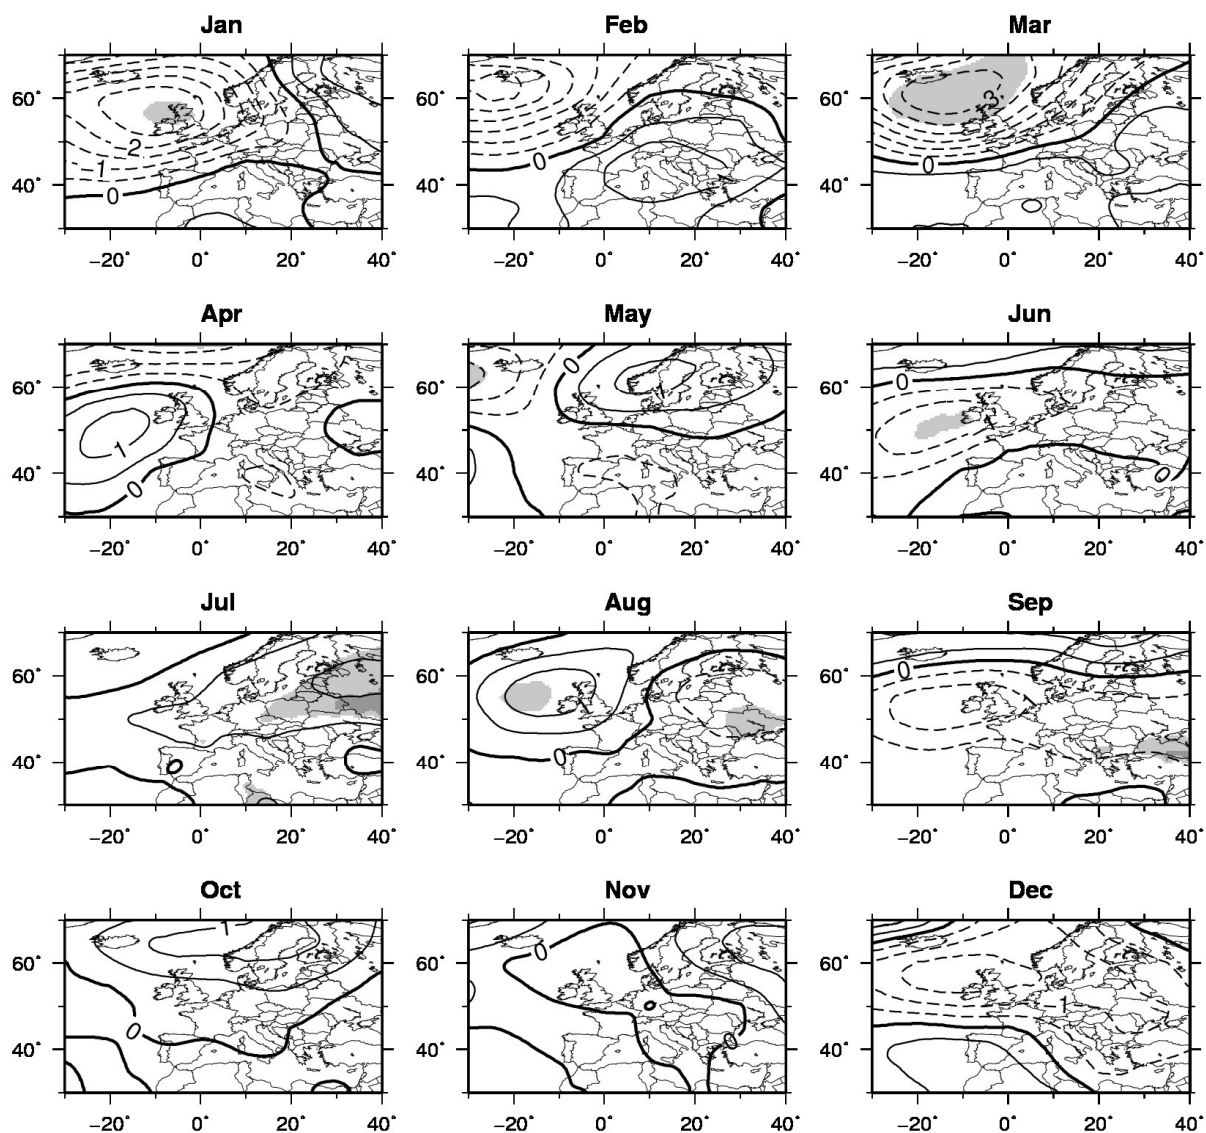

1  
2  
3  
4  
5  
6

Figure S1. Monthly maps of composites differences for the SLP reconstruction by Luterbacher et al. (2002) over 1749-2002. Light (dark) gray shaded areas indicate significant differences at the 5% (1%) level after a standard Student's t-test.

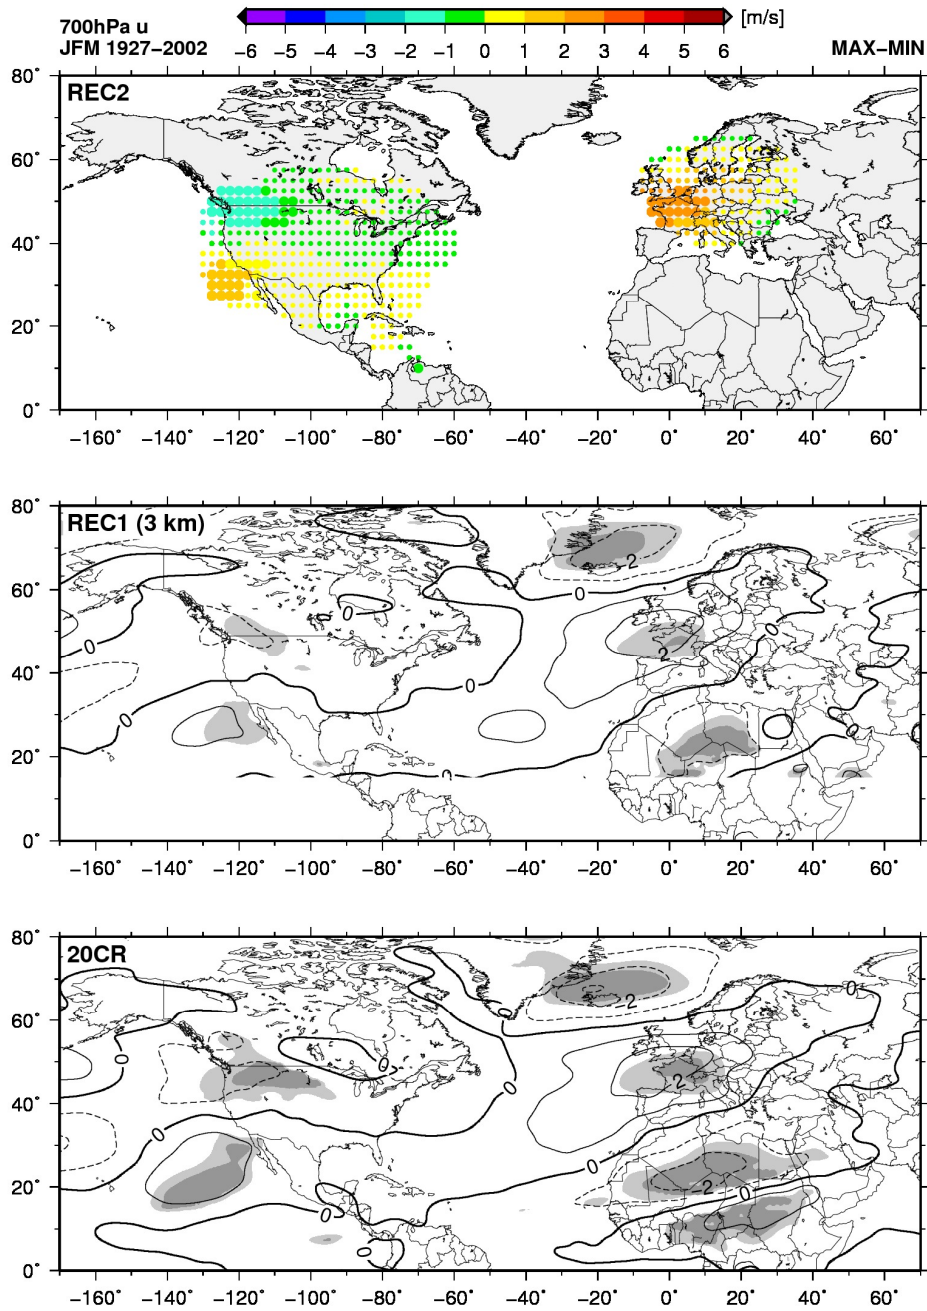

1  
2  
3  
4  
5  
6  
7

Figure S2. Maps of differences between maxima and minima composites for 700 hPa zonal wind in the REC2 reconstruction (top panel), 3 km zonal wind in the REC1 reconstruction (middle panel) and 700 hPa zonal wind in the 20CR (bottom panel). Significance is represented like in Fig. 5.

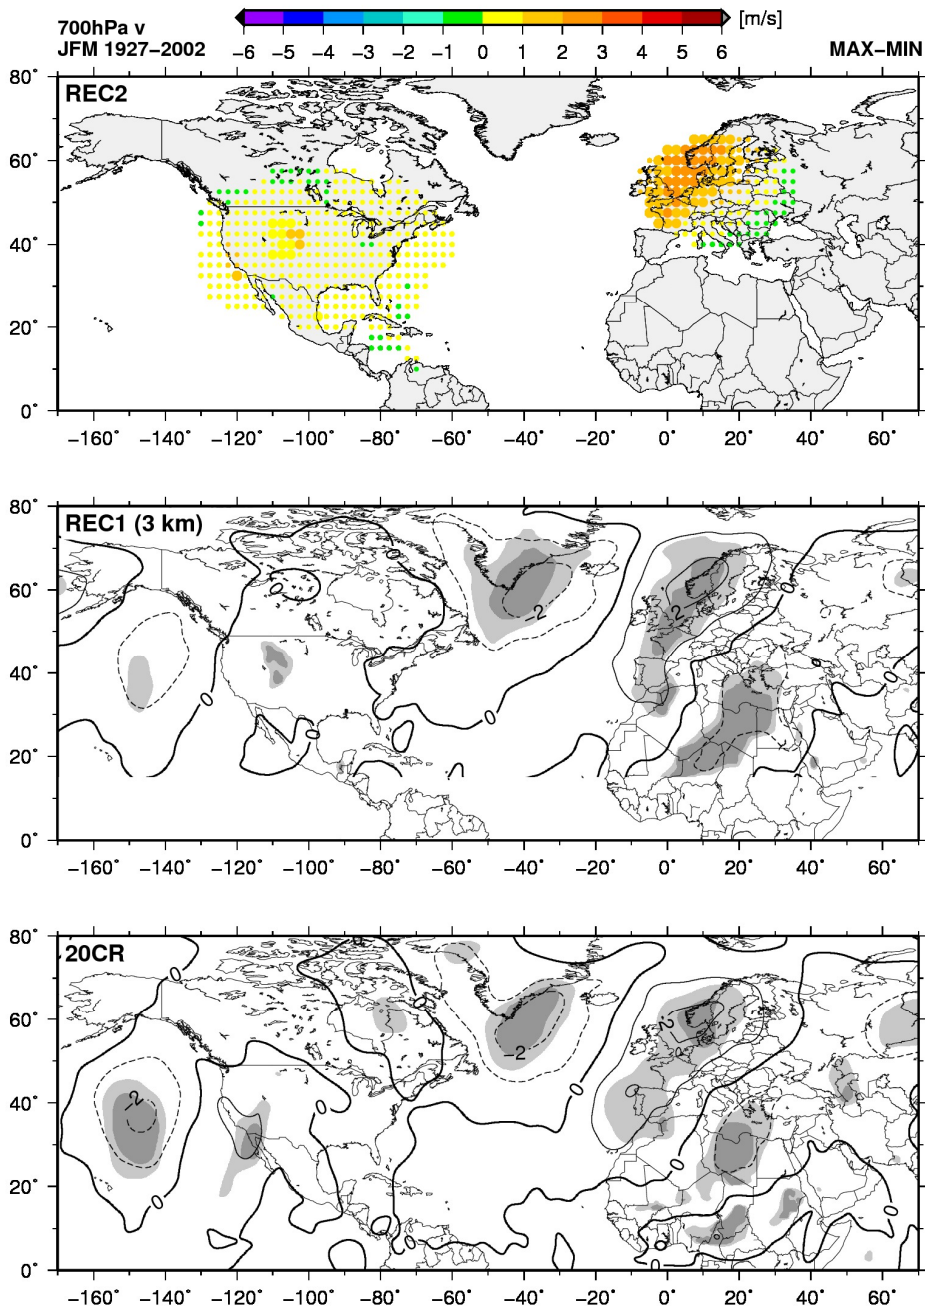

1

2

3 Figure S3. Similar to Fig. S2, but showing meridional wind in m/s.
